# Supplementary material
Source: ML conference proceedings conference paper supplement (https://proceedings.neurips.cc/paper_files/paper/2016/hash/b1563a78ec59337587f6ab6397699afc-Abstract.html)
Supplement: Supplementary file [file b1563a78ec59337587f6ab6397699afc-Supplemental.zip]

---

# Tensor Switching Networks: Supplementary Material

---

**Chuan-Yung Tsai\*, Andrew Saxe\*, David Cox**  
 Center for Brain Science, Harvard University, Cambridge, MA 02138  
 {chuanyungtsai, asaxe, davidcox}@fas.harvard.edu

## Alternative Derivation of TS-ReLU Kernel

Given  $\mathbf{x}, \mathbf{y} \in \mathbb{R}^{n_0}$ , we wish to derive  $\bar{k}^{\text{TS}}$  in

$$k_1^{\text{TS}}(\mathbf{x}, \mathbf{y}) = 2 \mathbb{E} [H(\mathbf{w}^\top \mathbf{x}) H(\mathbf{w}^\top \mathbf{y})] \mathbf{x}^\top \mathbf{y} = \underbrace{2 P(\mathbf{w}^\top \mathbf{x} > 0 \text{ and } \mathbf{w}^\top \mathbf{y} > 0)}_{\bar{k}^{\text{TS}}} \mathbf{x}^\top \mathbf{y},$$

where  $\mathbf{w} \sim \mathcal{N}(\mathbf{0}, \sigma^2 \mathbf{I})$ . To achieve this goal, we define

$$\begin{bmatrix} z_1 \\ z_2 \end{bmatrix} = \underbrace{\begin{bmatrix} \mathbf{x}^\top / \sigma \|\mathbf{x}\| \\ \mathbf{y}^\top / \sigma \|\mathbf{y}\| \end{bmatrix}}_{\mathbf{L}} \mathbf{w} \sim \mathcal{N} \left( \mathbf{0}, \underbrace{\begin{bmatrix} 1 & \cos \theta \\ \cos \theta & 1 \end{bmatrix}}_{\mathbf{L}(\sigma^2 \mathbf{I})\mathbf{L}^\top} \right). \quad (1)$$

Then we have

$$\begin{aligned} \bar{k}^{\text{TS}} &= 2 P(\mathbf{w}^\top \mathbf{x} > 0 \text{ and } \mathbf{w}^\top \mathbf{y} > 0) \\ &= 2 P \left( \frac{\mathbf{w}^\top \mathbf{x}}{\sigma \|\mathbf{x}\|} > 0 \text{ and } \frac{\mathbf{w}^\top \mathbf{y}}{\sigma \|\mathbf{y}\|} > 0 \right) \\ &= 2 P(z_1 > 0 \text{ and } z_2 > 0) \\ &= 2 \int_0^\infty \int_0^\infty \frac{1}{2\pi \sqrt{1 - \cos^2 \theta}} \exp \left( -\frac{z_1^2 - 2z_1 z_2 \cos \theta + z_2^2}{2(1 - \cos^2 \theta)} \right) dz_1 dz_2 \quad \text{Using PDF of (1)} \\ &= \frac{1}{\pi \sin \theta} \int_0^{\frac{\pi}{2}} \int_0^\infty r \exp \left( -r^2 \frac{1 - \cos \theta \sin 2\phi}{2 \sin^2 \theta} \right) dr d\phi \quad \text{Polar Coordinates} \\ &= \frac{1}{\pi \sin \theta} \int_0^{\frac{\pi}{2}} \left( -\frac{1}{2a} \exp(-r^2 a) \Big|_{r=0}^\infty \right) d\phi \quad a = \frac{1 - \cos \theta \sin 2\phi}{2 \sin^2 \theta} \\ &= \frac{1}{\pi \sin \theta} \int_0^{\frac{\pi}{2}} \frac{1}{2a} d\phi \\ &= \frac{1}{\pi} \sin \theta \int_0^{\frac{\pi}{2}} \frac{1}{1 - \cos \theta \sin 2\phi} d\phi \quad \text{Special Case of (A.3) of [1]} \\ &= \frac{1}{\pi} \sin \theta \left( \frac{\pi - \theta}{\sin \theta} \right) \quad \text{Following (A.6) of [1]} \\ &= 1 - \frac{\theta}{\pi}. \end{aligned}$$

Thus,  $k_1^{\text{TS}}(\mathbf{x}, \mathbf{y}) = \left(1 - \frac{\theta}{\pi}\right) \mathbf{x}^\top \mathbf{y}$ .

---

\*Equal contribution.

## References

- [1] Y. Cho and L. Saul, "Large-Margin Classification in Infinite Neural Networks," *Neural Computation*, 2010.
